# Supplementary material
Source: HighWire-hosted journal article supplement (https://erj.ersjournals.com/content/56/5/2000205)
Supplement: inline-supplementary-material-1 [file inline-supplementary-material-1.pdf]

p.Phe508del/  
p.Trp1282X

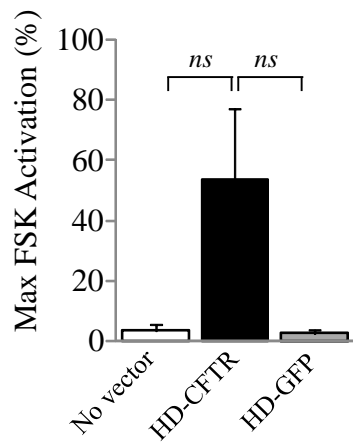

c.489+1G>T/  
c.489+1G>T

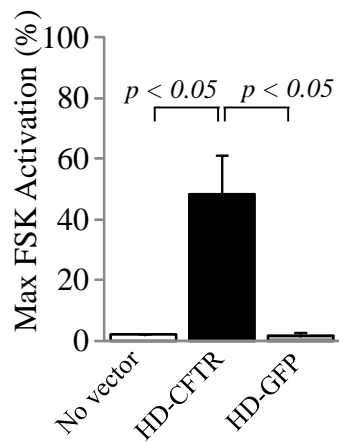

p.Trp1282X/  
p.Trp1282X

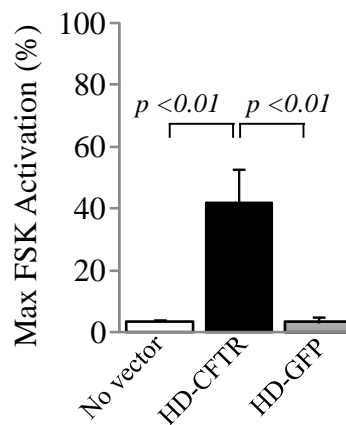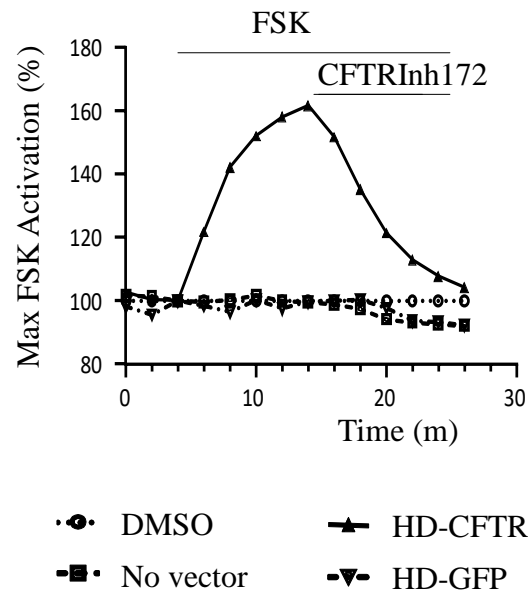

Supplementary Figure 1
