# Supplementary material
Source: HighWire-hosted journal article supplement (https://erj.ersjournals.com/content/56/5/2000205)
Supplement: inline-supplementary-material-3 [file inline-supplementary-material-3.pdf]

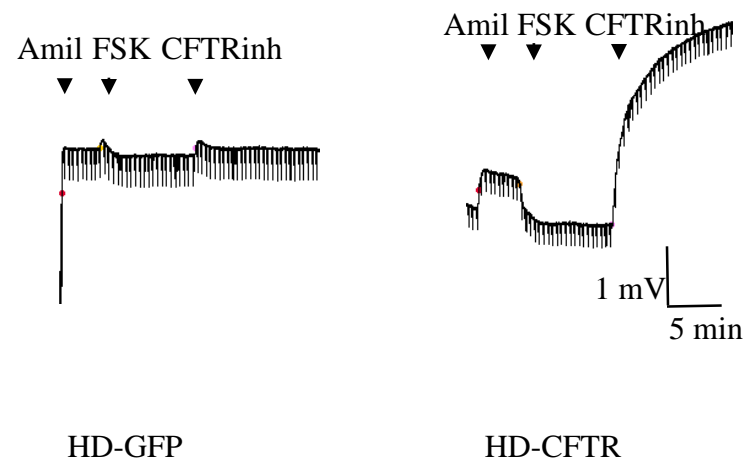

Supplementary Figure 3
