# Supplementary material
Source: HighWire-hosted journal article supplement (https://erj.ersjournals.com/content/56/5/2000205)
Supplement: inline-supplementary-material-4 [file inline-supplementary-material-4.pdf]

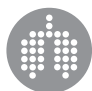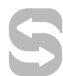

SHAREABLE PDF

# A helper-dependent adenoviral vector rescues CFTR to wild-type functional levels in cystic fibrosis epithelial cells harbouring class I mutations

Huibi Cao<sup>1,7</sup>, Hong Ouyang<sup>1,7</sup>, Onofrio Laselva<sup>2,3</sup>, Claire Bartlett<sup>1</sup>, Zhichang Peter Zhou<sup>1</sup>, Cathleen Duan<sup>1</sup>, Tarini Gunawardena<sup>1</sup>, Julie Avolio<sup>1</sup>, Christine E. Bear<sup>2,3,4</sup>, Tanja Gonska<sup>1,5</sup>, Jim Hu<sup>1,8</sup> and Theo J. Moraes<sup>1,5,6,8</sup>

**Affiliations:** <sup>1</sup>Programmes in Translational Medicine, Research Institute, Hospital for Sick Children, Toronto, ON, Canada. <sup>2</sup>Molecular Medicine, Research Institute, Hospital for Sick Children, Toronto, ON, Canada. <sup>3</sup>Dept of Physiology, University of Toronto, Toronto, ON, Canada. <sup>4</sup>Dept of Biochemistry, University of Toronto, Toronto, ON, Canada. <sup>5</sup>Dept of Paediatrics, University of Toronto, Toronto, ON, Canada. <sup>6</sup>Dept of Laboratory Medicine and Pathobiology, University of Toronto, Toronto, ON, Canada. <sup>7</sup>Both authors contributed equally to this work. <sup>8</sup>Both senior authors contributed equally to this article as lead authors and jointly supervised the work.

**Correspondence:** Theo J. Moraes, The Hospital for Sick Children, Peter Gilgan Centre for Research and Learning, 686 Bay St, Room 09.9714, Toronto, Ontario, M5G 0A4, Canada. E-mail: theo.moraes@sickkids.ca

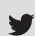

@ERSpublications

**CFTR modulators can correct CFTR function in many individuals with CF; however, the correction is not uniform nor universal. There is potential for an adenoviral CFTR vector to correct class I CFTR mutations and benchmark drug responses *in vitro*.** <https://bit.ly/3eim6IP>

**Cite this article as:** Cao H, Ouyang H, Laselva O, *et al.* A helper-dependent adenoviral vector rescues CFTR to wild-type functional levels in cystic fibrosis epithelial cells harbouring class I mutations. *Eur Respir J* 2020; 56: 2000205 [https://doi.org/10.1183/13993003.00205-2020].

This single-page version can be shared freely online.

**ABSTRACT** Cystic fibrosis (CF) is a genetic disorder affecting multiple organs, including the pancreas, hepatobiliary system and reproductive organs; however, lung disease is responsible for the majority of morbidity and mortality. Management of CF involves CF transmembrane conductance regulator (CFTR) modulator agents including corrector drugs to augment cellular trafficking of mutant CFTR as well as potentiators that open defective CFTR channels. These therapies are poised to help most individuals with CF, with the notable exception of individuals with class I mutations where full-length CFTR protein is not produced. For these mutations, gene replacement has been suggested as a potential solution.

In this work, we used a helper-dependent adenoviral vector (HD-CFTR) to express CFTR in nasal epithelial cell cultures derived from CF subjects with class I CFTR mutations.

CFTR function was significantly restored in CF cells by HD-CFTR and reached healthy control functional levels as detected by Ussing chamber and membrane potential (FLIPR) assay. A dose-response relationship was observed between the amount of vector used and subsequent functional outcomes; small amounts of HD-CFTR were sufficient to correct CFTR function. At higher doses, HD-CFTR did not increase CFTR function in healthy control cells above baseline values. This latter observation allowed us to use this vector to benchmark *in vitro* efficacy testing of CFTR-modulator drugs.

In summary, we demonstrate the potential for HD-CFTR to inform *in vitro* testing and to restore CFTR function to healthy control levels in airway cells with class I or CFTR nonsense mutations.
